# Supplementary material
Source: PubMed Central journal article supplement (PMC6265643)
Supplement: blood835496-suppl1.pdf [file blood835496-suppl1.pdf]

|                                                    | Maximum Grade Per Patient Per Event<br>(At least possibly related) |       |        |        |          |       |           |       |          |      |
|----------------------------------------------------|--------------------------------------------------------------------|-------|--------|--------|----------|-------|-----------|-------|----------|------|
|                                                    | Grade of Adverse Event                                             |       |        |        |          |       |           |       |          |      |
|                                                    | 1- Mild                                                            |       | 2- Mod |        | 3-Severe |       | 4-LifeThr |       | 5-Lethal |      |
|                                                    | n                                                                  | (%)   | n      | (%)    | n        | (%)   | n         | (%)   | n        | (%)  |
| <b>Dose Escalation Cohort: Dose Level 1 (3 mg)</b> |                                                                    |       |        |        |          |       |           |       |          |      |
| <b>Number of Evaluable Patients: 3</b>             |                                                                    |       |        |        |          |       |           |       |          |      |
| <b>Hematologic Adverse Events</b>                  |                                                                    |       |        |        |          |       |           |       |          |      |
| <b>Blood/Bone Marrow</b>                           |                                                                    |       |        |        |          |       |           |       |          |      |
| Anemia                                             | 1                                                                  | (33%) | 1      | (33%)  | 0        | (0%)  | 0         | (0%)  | 0        | (0%) |
| Neutrophil count decreased                         | 0                                                                  | (0%)  | 3      | (100%) | 0        | (0%)  | 0         | (0%)  | 0        | (0%) |
| Platelet count decreased                           | 2                                                                  | (67%) | 0      | (0%)   | 0        | (0%)  | 0         | (0%)  | 0        | (0%) |
| White blood cell decreased                         | 0                                                                  | (0%)  | 2      | (67%)  | 1        | (33%) | 0         | (0%)  | 0        | (0%) |
| <b>Non-Hematologic Adverse Events</b>              |                                                                    |       |        |        |          |       |           |       |          |      |
| <b>Infections and infestations</b>                 |                                                                    |       |        |        |          |       |           |       |          |      |
| Lung infection                                     | 0                                                                  | (0%)  | 0      | (0%)   | 0        | (0%)  | 1         | (33%) | 0        | (0%) |
| <b>Respirat, thor, mediast disord</b>              |                                                                    |       |        |        |          |       |           |       |          |      |
| Respiratory failure                                | 0                                                                  | (0%)  | 0      | (0%)   | 0        | (0%)  | 1         | (33%) | 0        | (0%) |
| <b>Dose Escalation Cohort: Dose Level 2 (5 mg)</b> |                                                                    |       |        |        |          |       |           |       |          |      |
| <b>Number of Evaluable Patients: 6</b>             |                                                                    |       |        |        |          |       |           |       |          |      |
| <b>Hematologic Adverse Events</b>                  |                                                                    |       |        |        |          |       |           |       |          |      |
| <b>Blood/Bone Marrow</b>                           |                                                                    |       |        |        |          |       |           |       |          |      |
| Anemia                                             | 3                                                                  | (50%) | 2      | (33%)  | 1        | (17%) | 0         | (0%)  | 0        | (0%) |
| Lymphocyte count decreased                         | 0                                                                  | (0%)  | 1      | (17%)  | 0        | (0%)  | 1         | (17%) | 0        | (0%) |
| Neutrophil count decreased                         | 1                                                                  | (17%) | 2      | (33%)  | 2        | (33%) | 1         | (17%) | 0        | (0%) |
| Platelet count decreased                           | 2                                                                  | (33%) | 1      | (17%)  | 0        | (0%)  | 0         | (0%)  | 0        | (0%) |
| White blood cell decreased                         | 1                                                                  | (17%) | 1      | (17%)  | 1        | (17%) | 1         | (17%) | 0        | (0%) |
| <b>Non-Hematologic Adverse Events</b>              |                                                                    |       |        |        |          |       |           |       |          |      |
| <b>Eye disorders</b>                               |                                                                    |       |        |        |          |       |           |       |          |      |
| Eyelid function disorder                           | 0                                                                  | (0%)  | 1      | (17%)  | 0        | (0%)  | 0         | (0%)  | 0        | (0%) |
| <b>Gastrointestinal disorders</b>                  |                                                                    |       |        |        |          |       |           |       |          |      |
| Constipation                                       | 0                                                                  | (0%)  | 1      | (17%)  | 0        | (0%)  | 0         | (0%)  | 0        | (0%) |
| Mucositis oral                                     | 0                                                                  | (0%)  | 1      | (17%)  | 0        | (0%)  | 0         | (0%)  | 0        | (0%) |
| <b>Gen disord and admin site cond</b>              |                                                                    |       |        |        |          |       |           |       |          |      |
| Fatigue                                            | 1                                                                  | (17%) | 1      | (17%)  | 1        | (17%) | 0         | (0%)  | 0        | (0%) |
| <b>Infections and infestations</b>                 |                                                                    |       |        |        |          |       |           |       |          |      |
| Bronchial infection                                | 0                                                                  | (0%)  | 1      | (17%)  | 0        | (0%)  | 0         | (0%)  | 0        | (0%) |
| <b>Metabol and nutrition disord</b>                |                                                                    |       |        |        |          |       |           |       |          |      |
| Hyperglycemia                                      | 0                                                                  | (0%)  | 1      | (17%)  | 0        | (0%)  | 0         | (0%)  | 0        | (0%) |
| <b>Nervous system disorders</b>                    |                                                                    |       |        |        |          |       |           |       |          |      |
| Syncope                                            | 0                                                                  | (0%)  | 0      | (0%)   | 1        | (17%) | 0         | (0%)  | 0        | (0%) |
| <b>Skin and subcutan tiss disord</b>               |                                                                    |       |        |        |          |       |           |       |          |      |
| Rash maculo-papular                                | 0                                                                  | (0%)  | 1      | (17%)  | 0        | (0%)  | 0         | (0%)  | 0        | (0%) |
| <b>Vascular disorders</b>                          |                                                                    |       |        |        |          |       |           |       |          |      |
| Thromboembolic event                               | 0                                                                  | (0%)  | 1      | (17%)  | 0        | (0%)  | 0         | (0%)  | 0        | (0%) |
| <b>Dose Escalation Cohort: Dose Level 3 (7 mg)</b> |                                                                    |       |        |        |          |       |           |       |          |      |
| <b>Number of Evaluable Patients: 6</b>             |                                                                    |       |        |        |          |       |           |       |          |      |
| <b>Hematologic Adverse Events</b>                  |                                                                    |       |        |        |          |       |           |       |          |      |
| <b>Blood/Bone Marrow</b>                           |                                                                    |       |        |        |          |       |           |       |          |      |
| Anemia                                             | 2                                                                  | (33%) | 2      | (33%)  | 0        | (0%)  | 0         | (0%)  | 0        | (0%) |
| Lymphocyte count decreased                         | 0                                                                  | (0%)  | 1      | (17%)  | 0        | (0%)  | 0         | (0%)  | 0        | (0%) |
| Neutrophil count decreased                         | 1                                                                  | (17%) | 4      | (67%)  | 0        | (0%)  | 0         | (0%)  | 0        | (0%) |
| Platelet count decreased                           | 1                                                                  | (17%) | 0      | (0%)   | 0        | (0%)  | 1         | (17%) | 0        | (0%) |
| White blood cell decreased                         | 1                                                                  | (17%) | 1      | (17%)  | 1        | (17%) | 0         | (0%)  | 0        | (0%) |
| <b>Non-Hematologic Adverse Events</b>              |                                                                    |       |        |        |          |       |           |       |          |      |
| <b>Gen disord and admin site cond</b>              |                                                                    |       |        |        |          |       |           |       |          |      |
| Fatigue                                            | 0                                                                  | (0%)  | 1      | (17%)  | 1        | (17%) | 0         | (0%)  | 0        | (0%) |
| <b>Infections and infestations</b>                 |                                                                    |       |        |        |          |       |           |       |          |      |
| Bronchial infection                                | 0                                                                  | (0%)  | 1      | (17%)  | 0        | (0%)  | 0         | (0%)  | 0        | (0%) |
| Infections and infestations - Oth spec             | 0                                                                  | (0%)  | 1      | (17%)  | 0        | (0%)  | 0         | (0%)  | 0        | (0%) |
| Lung infection                                     | 0                                                                  | (0%)  | 1      | (17%)  | 1        | (17%) | 0         | (0%)  | 0        | (0%) |
| Mucosal infection                                  | 0                                                                  | (0%)  | 1      | (17%)  | 0        | (0%)  | 0         | (0%)  | 0        | (0%) |
| Sepsis                                             | 0                                                                  | (0%)  | 0      | (0%)   | 0        | (0%)  | 1         | (17%) | 0        | (0%) |
| <b>Investigations</b>                              |                                                                    |       |        |        |          |       |           |       |          |      |
| Aspartate aminotransferase increased               | 0                                                                  | (0%)  | 1      | (17%)  | 0        | (0%)  | 0         | (0%)  | 0        | (0%) |
| Blood bilirubin increased                          | 0                                                                  | (0%)  | 1      | (17%)  | 0        | (0%)  | 0         | (0%)  | 0        | (0%) |
| <b>Metabol and nutrition disord</b>                |                                                                    |       |        |        |          |       |           |       |          |      |
| Anorexia                                           | 0                                                                  | (0%)  | 1      | (17%)  | 0        | (0%)  | 0         | (0%)  | 0        | (0%) |
| Hypocalcemia                                       | 0                                                                  | (0%)  | 1      | (17%)  | 0        | (0%)  | 0         | (0%)  | 0        | (0%) |
| Hypophosphatemia                                   | 0                                                                  | (0%)  | 1      | (17%)  | 0        | (0%)  | 0         | (0%)  | 0        | (0%) |
| <b>Nervous system disorders</b>                    |                                                                    |       |        |        |          |       |           |       |          |      |
| Peripheral sensory neuropathy                      | 1                                                                  | (17%) | 0      | (0%)   | 0        | (0%)  | 0         | (0%)  | 0        | (0%) |
| <b>Psychiatric disorders</b>                       |                                                                    |       |        |        |          |       |           |       |          |      |
| Delirium                                           | 0                                                                  | (0%)  | 1      | (17%)  | 0        | (0%)  | 0         | (0%)  | 0        | (0%) |
| <b>Respirat, thoracic, mediastinal disorders</b>   |                                                                    |       |        |        |          |       |           |       |          |      |
| Dyspnea                                            | 0                                                                  | (0%)  | 0      | (0%)   | 1        | (17%) | 0         | (0%)  | 0        | (0%) |
| Hypoxia                                            | 0                                                                  | (0%)  | 0      | (0%)   | 1        | (17%) | 0         | (0%)  | 0        | (0%) |
| Respiratory failure                                | 0                                                                  | (0%)  | 0      | (0%)   | 0        | (0%)  | 1         | (17%) | 0        | (0%) |
| <b>MTD Expansion Cohort (Dose- 5 mg)</b>           |                                                                    |       |        |        |          |       |           |       |          |      |
| <b>Number of Evaluable Patients: 9</b>             |                                                                    |       |        |        |          |       |           |       |          |      |
| <b>Hematologic Adverse Events</b>                  |                                                                    |       |        |        |          |       |           |       |          |      |
| <b>Blood/Bone Marrow</b>                           |                                                                    |       |        |        |          |       |           |       |          |      |
| Anemia                                             | 4                                                                  | (44%) | 3      | (33%)  | 1        | (11%) | 0         | (0%)  | 0        | (0%) |
| Lymphocyte count decreased                         | 0                                                                  | (0%)  | 2      | (22%)  | 1        | (11%) | 0         | (0%)  | 0        | (0%) |
| Neutrophil count decreased                         | 1                                                                  | (11%) | 3      | (33%)  | 1        | (11%) | 1         | (11%) | 0        | (0%) |
| Platelet count decreased                           | 3                                                                  | (33%) | 0      | (0%)   | 1        | (11%) | 0         | (0%)  | 0        | (0%) |
| White blood cell decreased                         | 3                                                                  | (33%) | 1      | (11%)  | 0        | (0%)  | 1         | (11%) | 0        | (0%) |
| <b>Non-Hematologic Adverse Events</b>              |                                                                    |       |        |        |          |       |           |       |          |      |
| <b>Endocrine disorders</b>                         |                                                                    |       |        |        |          |       |           |       |          |      |
| Hypothyroidism                                     | 0                                                                  | (0%)  | 1      | (11%)  | 0        | (0%)  | 0         | (0%)  | 0        | (0%) |
| <b>Gastrointestinal disorders</b>                  |                                                                    |       |        |        |          |       |           |       |          |      |
| Diarrhea                                           | 2                                                                  | (22%) | 0      | (0%)   | 0        | (0%)  | 0         | (0%)  | 0        | (0%) |
| Dyspepsia                                          | 0                                                                  | (0%)  | 1      | (11%)  | 0        | (0%)  | 0         | (0%)  | 0        | (0%) |
| Nausea                                             | 1                                                                  | (11%) | 0      | (0%)   | 0        | (0%)  | 0         | (0%)  | 0        | (0%) |
| <b>Gen disord and admin site cond</b>              |                                                                    |       |        |        |          |       |           |       |          |      |
| Fatigue                                            | 0                                                                  | (0%)  | 5      | (56%)  | 0        | (0%)  | 0         | (0%)  | 0        | (0%) |
| <b>Infections and infestations</b>                 |                                                                    |       |        |        |          |       |           |       |          |      |
| Lung infection                                     | 0                                                                  | (0%)  | 1      | (11%)  | 1        | (11%) | 0         | (0%)  | 0        | (0%) |
| Upper respiratory infection                        | 0                                                                  | (0%)  | 1      | (11%)  | 0        | (0%)  | 0         | (0%)  | 0        | (0%) |
| <b>Nervous system disorders</b>                    |                                                                    |       |        |        |          |       |           |       |          |      |
| Peripheral sensory neuropathy                      | 0                                                                  | (0%)  | 1      | (11%)  | 0        | (0%)  | 0         | (0%)  | 0        | (0%) |
| <b>Skin and subcutan tiss disord</b>               |                                                                    |       |        |        |          |       |           |       |          |      |
| Photosensitivity                                   | 0                                                                  | (0%)  | 1      | (11%)  | 0        | (0%)  | 0         | (0%)  | 0        | (0%) |
| Rash maculo-papular                                | 0                                                                  | (0%)  | 0      | (0%)   | 1        | (11%) | 0         | (0%)  | 0        | (0%) |
| <b>Vascular disorders</b>                          |                                                                    |       |        |        |          |       |           |       |          |      |
| Thromboembolic event                               | 0                                                                  | (0%)  | 1      | (11%)  | 0        | (0%)  | 0         | (0%)  | 0        | (0%) |
